# Supplementary material
Source: PubMed Central journal article supplement (PMC3115683)

**Fig. S1**

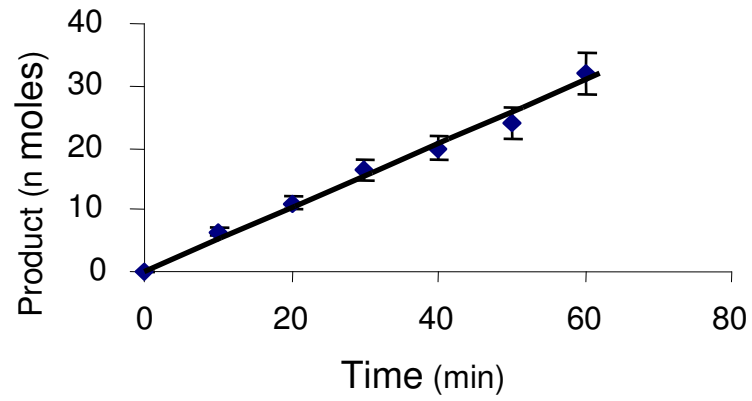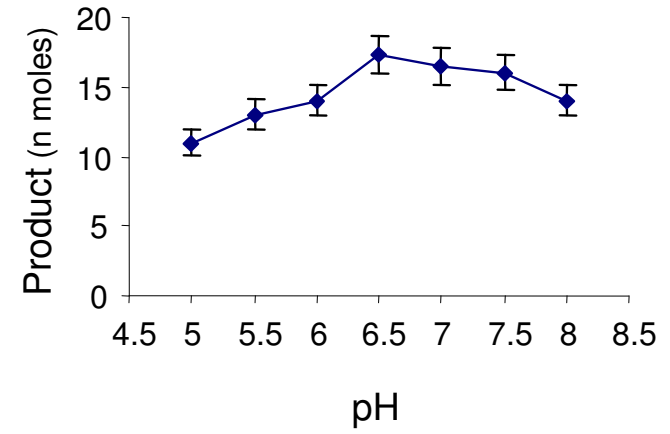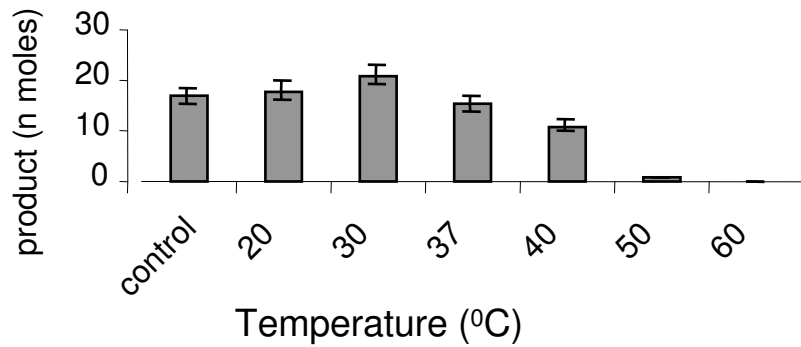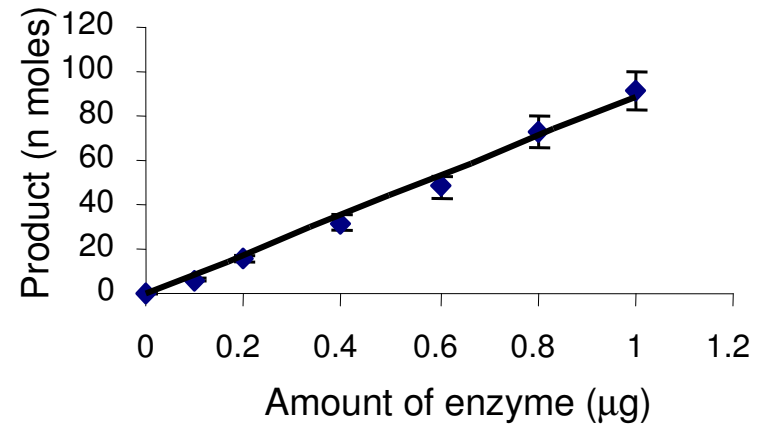

**Fig. S2**

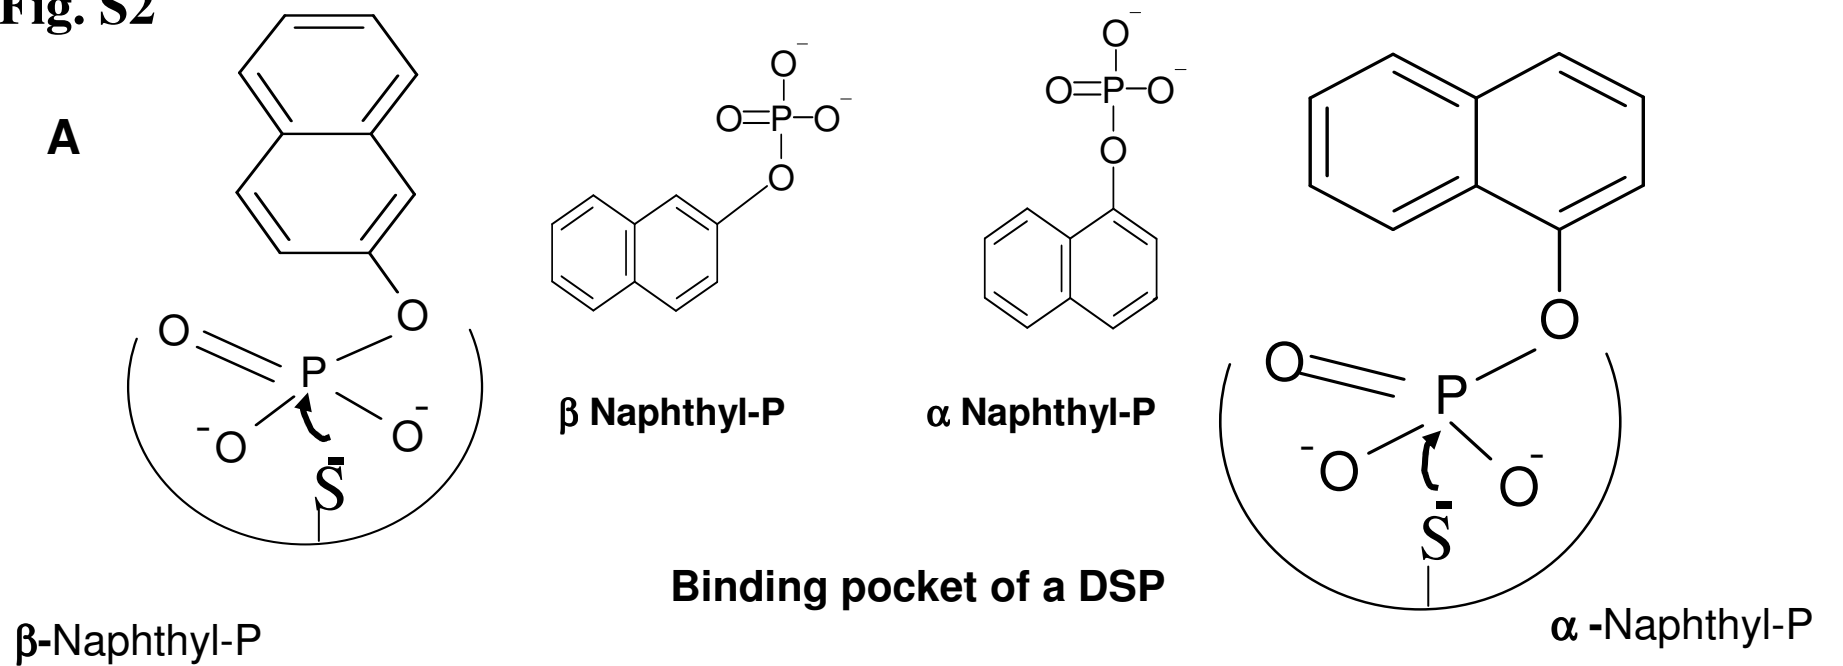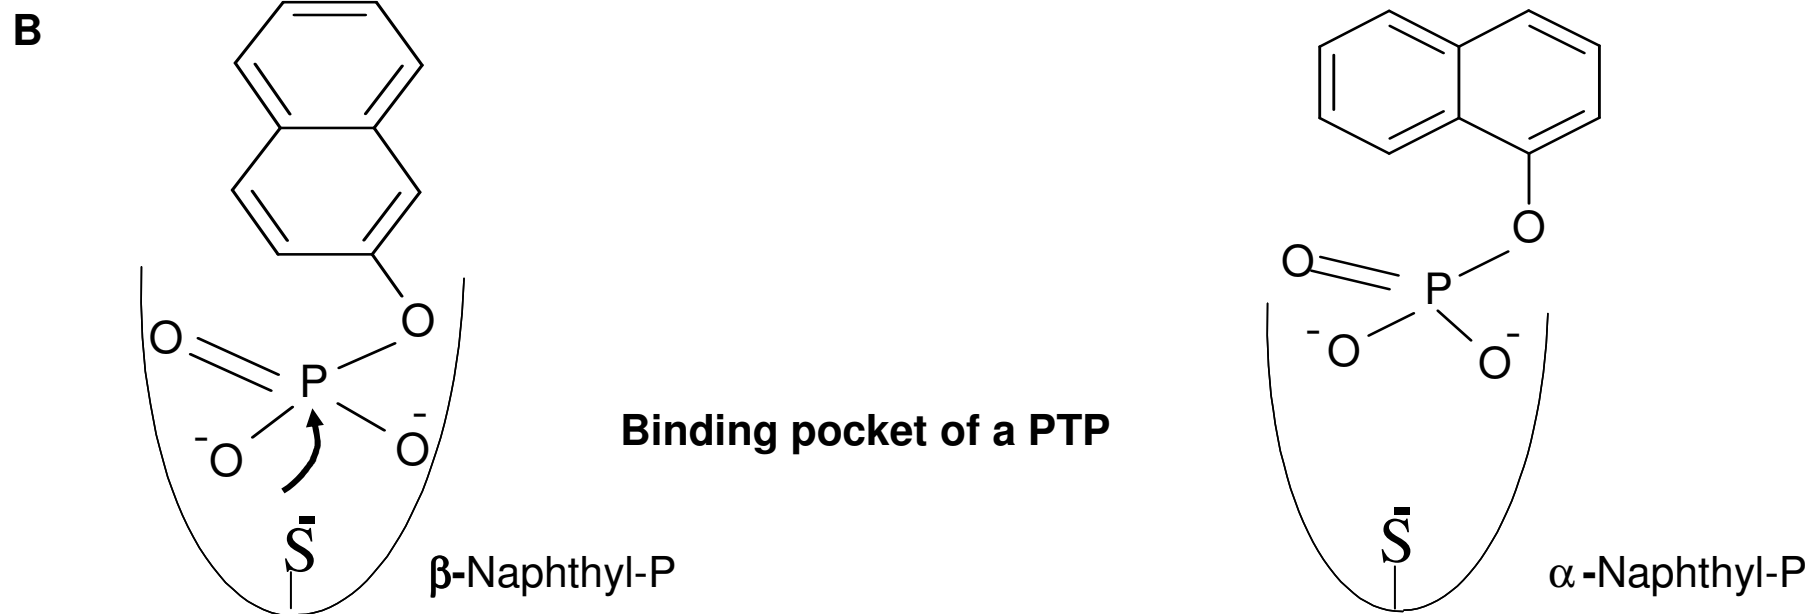

**Fig. S3**

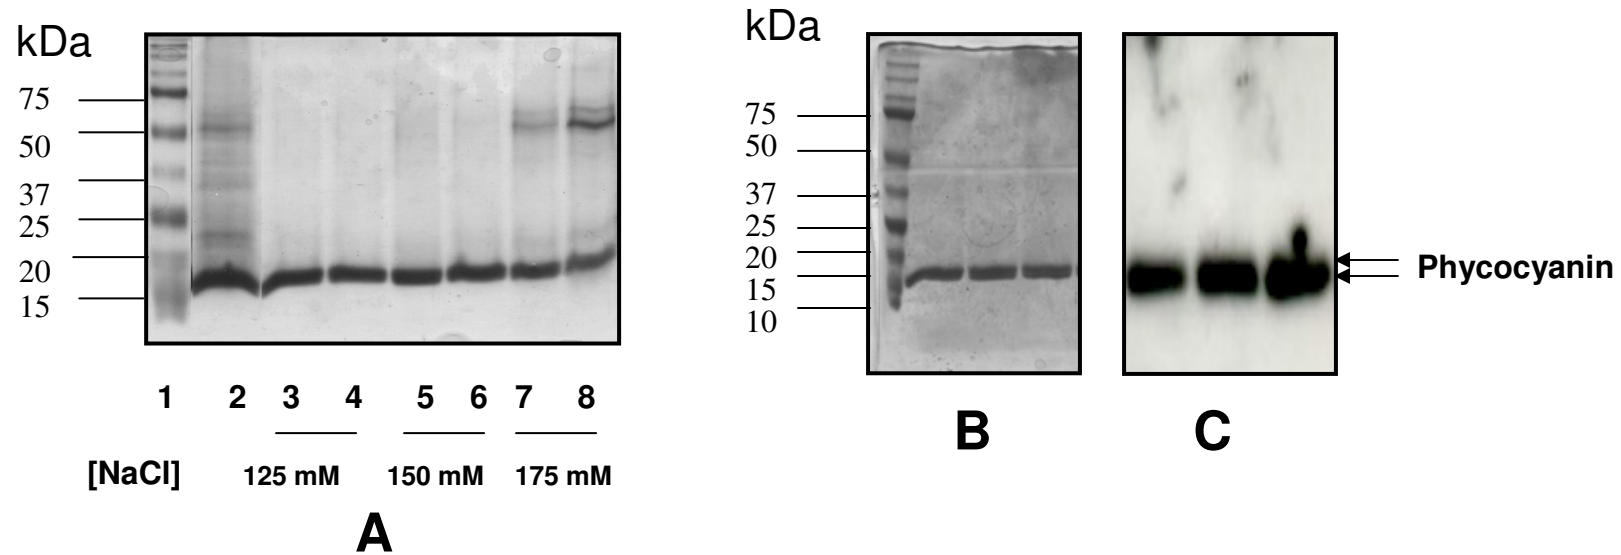

**Fig. S4**

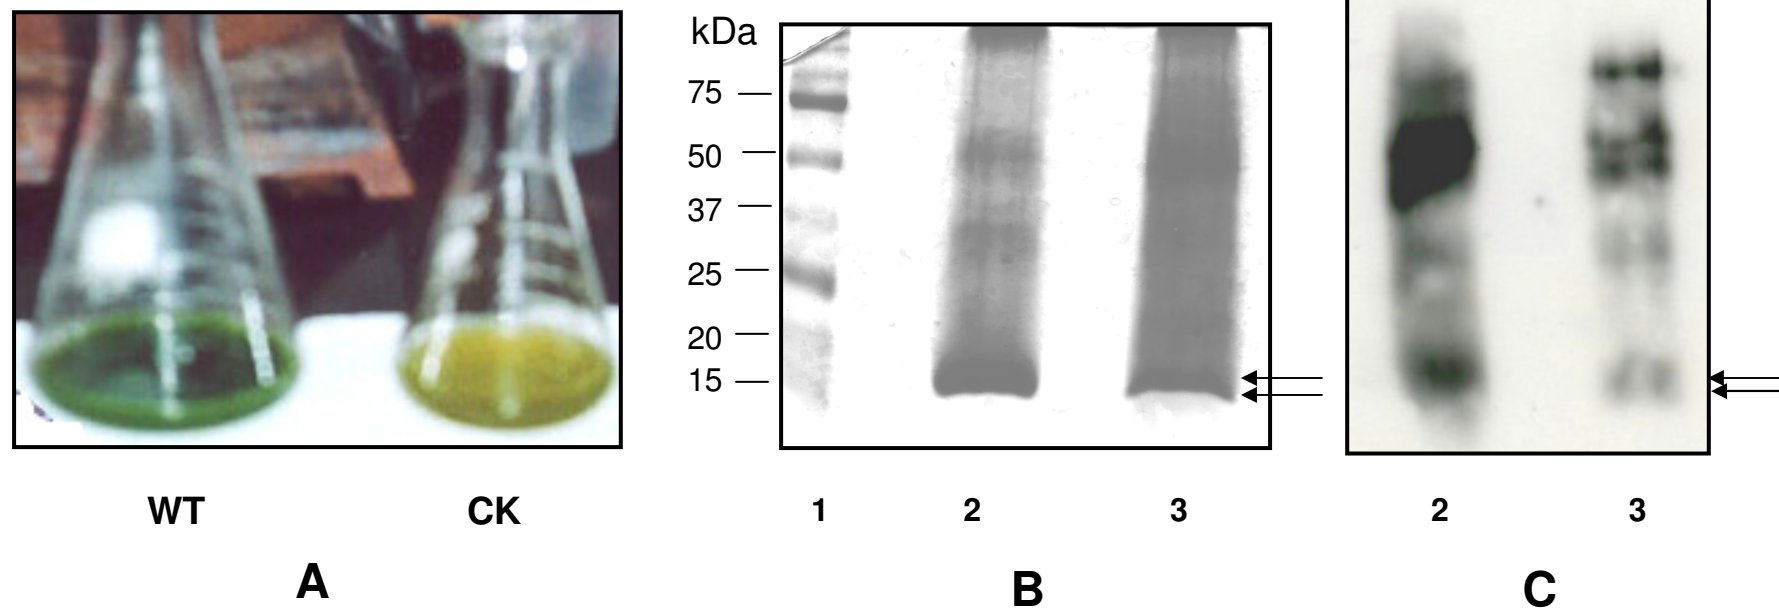

Supplement: supp_mvr014_Supplemenatry_Figs_1-4.pdf [file supp_mvr014_Supplemenatry_Figs_1-4.pdf]
